# Supplementary material for: Genetic Variation of Human Papillomavirus Type 16 in Individual Clinical Specimens Revealed by Deep Sequencing
Source: PLoS One. 2013 Nov 13;8(11):e80583. doi: 10.1371/journal.pone.0080583 (PMC3827439; doi:10.1371/journal.pone.0080583)
Supplement: Figure S4 — Alignment of denovo assembled HPV16 genome sequences. Eight de novo assembled complete HPV16 genome sequences (samples 1 to 7, and W12) were aligned against each other by MAFFT. The sequence alignment around the non-coding region between E5 and L2 is presented. The stop codon of E5 is indicated with dotted-line box. Numbering of nucleotide positions is based on the sequence of #1. (PDF) [file pone.0080583.s005.pdf]

|     | 4081                         | 4091    | 4101                   | 4111          | 4121         | 4131         |
|-----|------------------------------|---------|------------------------|---------------|--------------|--------------|
| #1  | gcacgcttttttaattacat         | aa      | gtatatgtacataatgtaattg | tacatataaattg | ttg          |              |
| #2  | gcacgcttttttaattacat         | aa      | gtatatgtacataatgtaattg | tacatataaattg | ttg          |              |
| #3  | gcacgcttcttaattacat          | aa      | gtatatgtacataatgtaattg | tacatataaattg | ttg          |              |
| #4  | gcacgcttcttaattacat          | aa      | gtatatgtacataatgtaattg | tacatataaattg | ttg          |              |
| #5  | gcacgcttttttaattacat         | aa      | gtatatgtacataatgtaattg | tacatataaattg | ttg          |              |
| #6  | gcacgcttttttaattacat         | aa      | gtatatgtacataatgtaattg | tacatataaattg | ttg          |              |
| #7  | gcacgcttttttaattacat         | aa      | gtatatgtacataatgtaattg | tacatataaattg | ttg          |              |
| W12 | gcacgcttttttaattacat         | aa      | gtatatgtacaaaatgtaattg | tacatataaattg | ttg          |              |
|     | *****.*****                  |         |                        |               |              |              |
|     | 4141                         | 4151    | 4161                   | 4171          | 4181         | 4191         |
| #1  | tataccataaacttactat          | ttttttt | ctttttttat             | -----         | ttttatatataa | ---ttttttttt |
| #2  | tataccataaacttactat          | ttttttt | ctttttttat             | -----         | ttttatatataa | ttttttttttt  |
| #3  | tataccataaattactgat          | ttttttt | ttttttttat             | ttttttat      | ttttatatata  | g---ttttttt  |
| #4  | tataccatcacttactgat          | ttttttt | ctttttgtat             | -----         | ttttatatata  | g---ttttttt  |
| #5  | tataccataaacttactat          | ttttttt | ctttttttat             | -----         | ttttatatata  | actttttttttt |
| #6  | tataccataaacttactat          | ttttttt | ctttttttat             | -----         | ttttatatata  | aa-ttttttg   |
| #7  | tataccataaacttactat          | ttttttt | ctttttttat             | -----         | ttttatatata  | aa-ttttttg   |
| W12 | tataccataaacttactat          | ttttttt | ctttttttat             | -----         | tttcatatata  | t-ttttttttt  |
|     | ***** * *****.*****.***** ** |         |                        |               |              |              |
|     | ***.***** *** **             |         |                        |               |              |              |

Kukimoto et al. Fig. S4
