# Supplementary material for: Genetic Variation of Human Papillomavirus Type 16 in Individual Clinical Specimens Revealed by Deep Sequencing
Source: PubMed Central journal article supplement (PMC3827439; doi:10.1371/journal.pone.0080583), 2013-11-13
Supplement: pone.0080583.s003.pdf [file pone.0080583.s003.pdf]

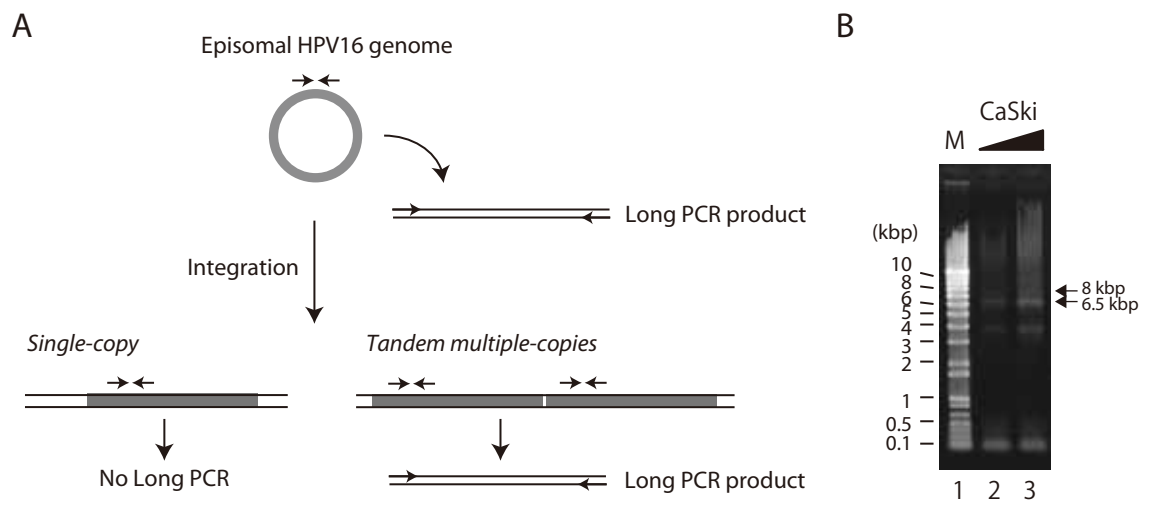

**Kukimoto et al. Fig. S2**
